# Supplementary material
Source: PubMed Central journal article supplement (PMC3976996)

Figure 2 (Supplemental).

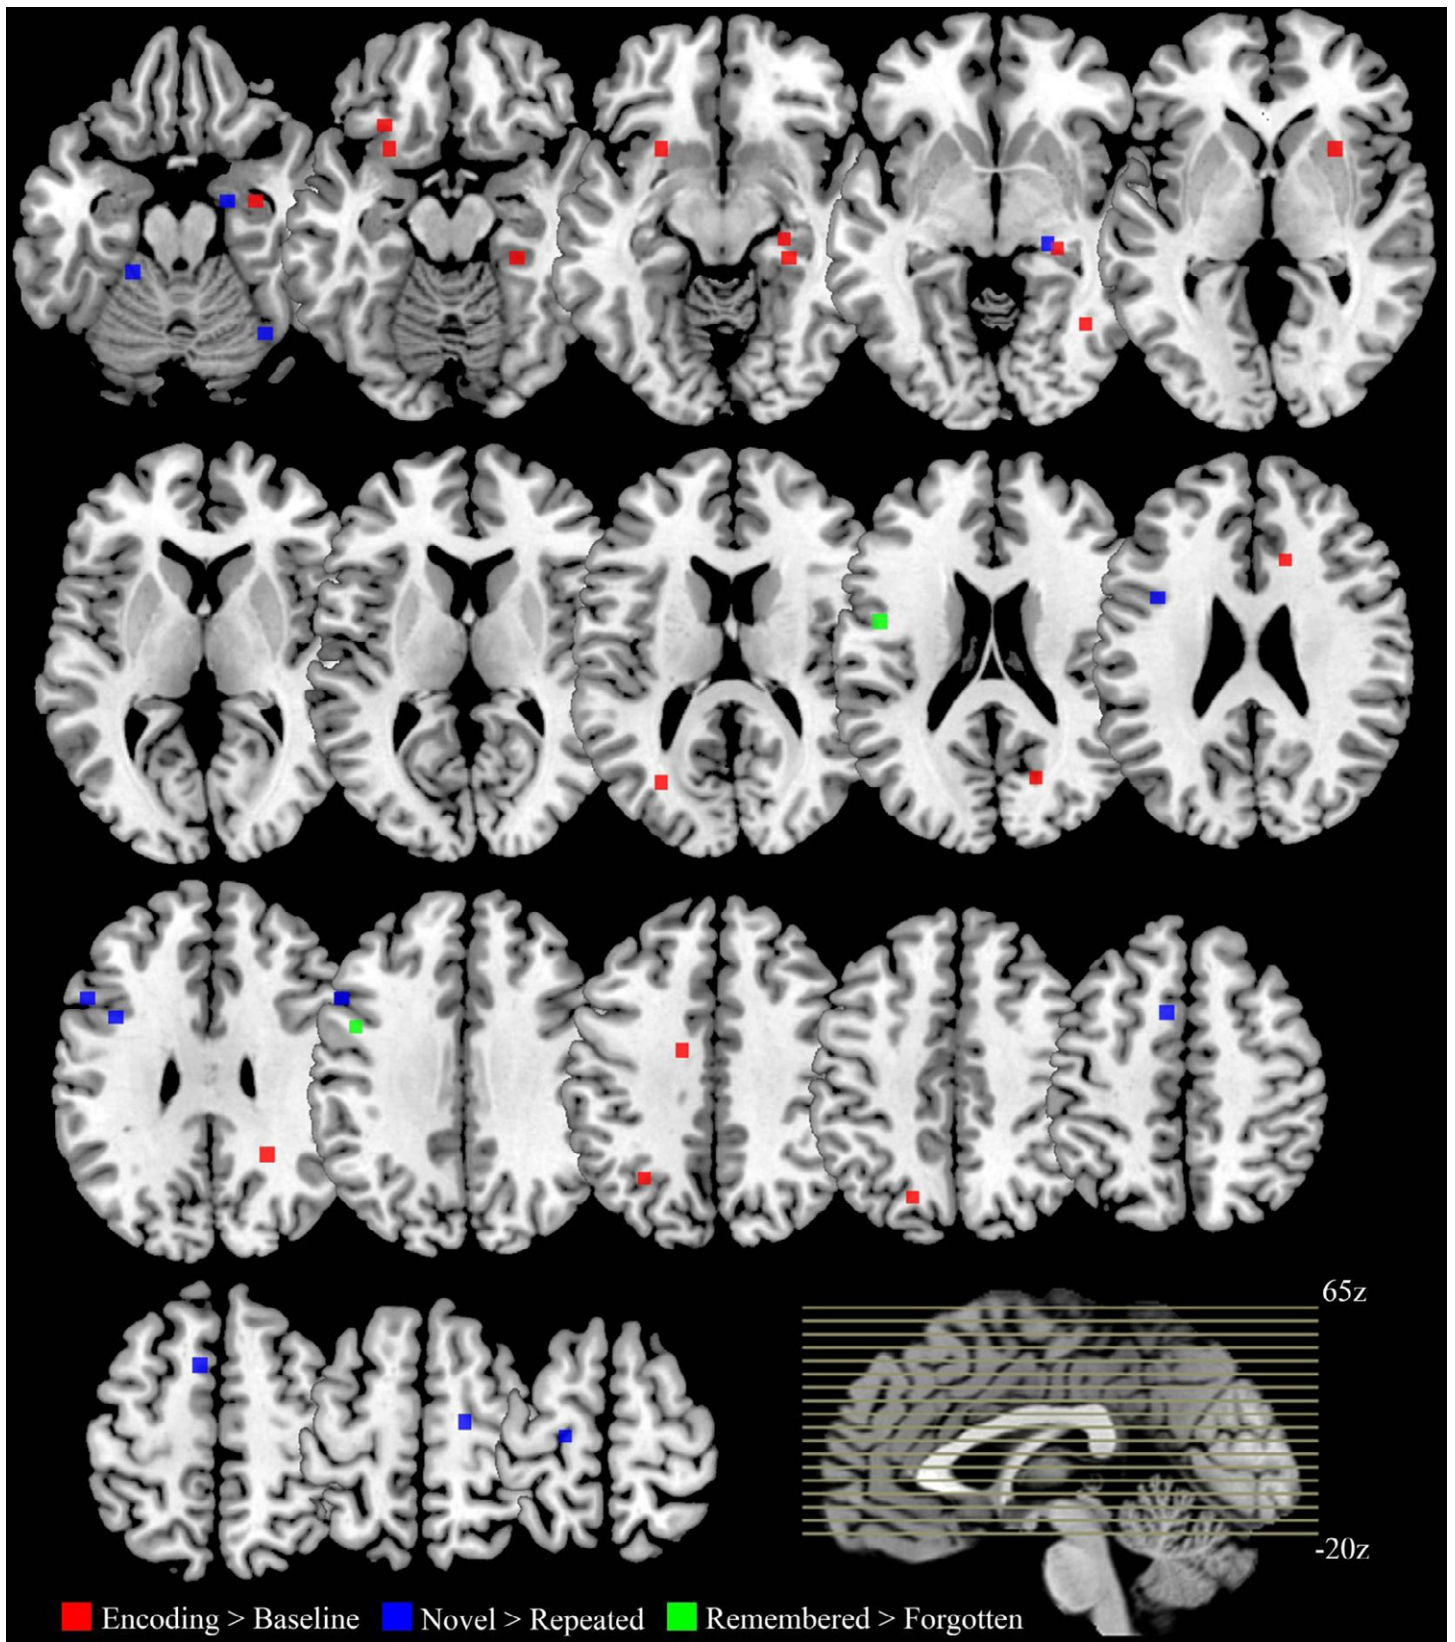

Figure 3 (Supplemental).

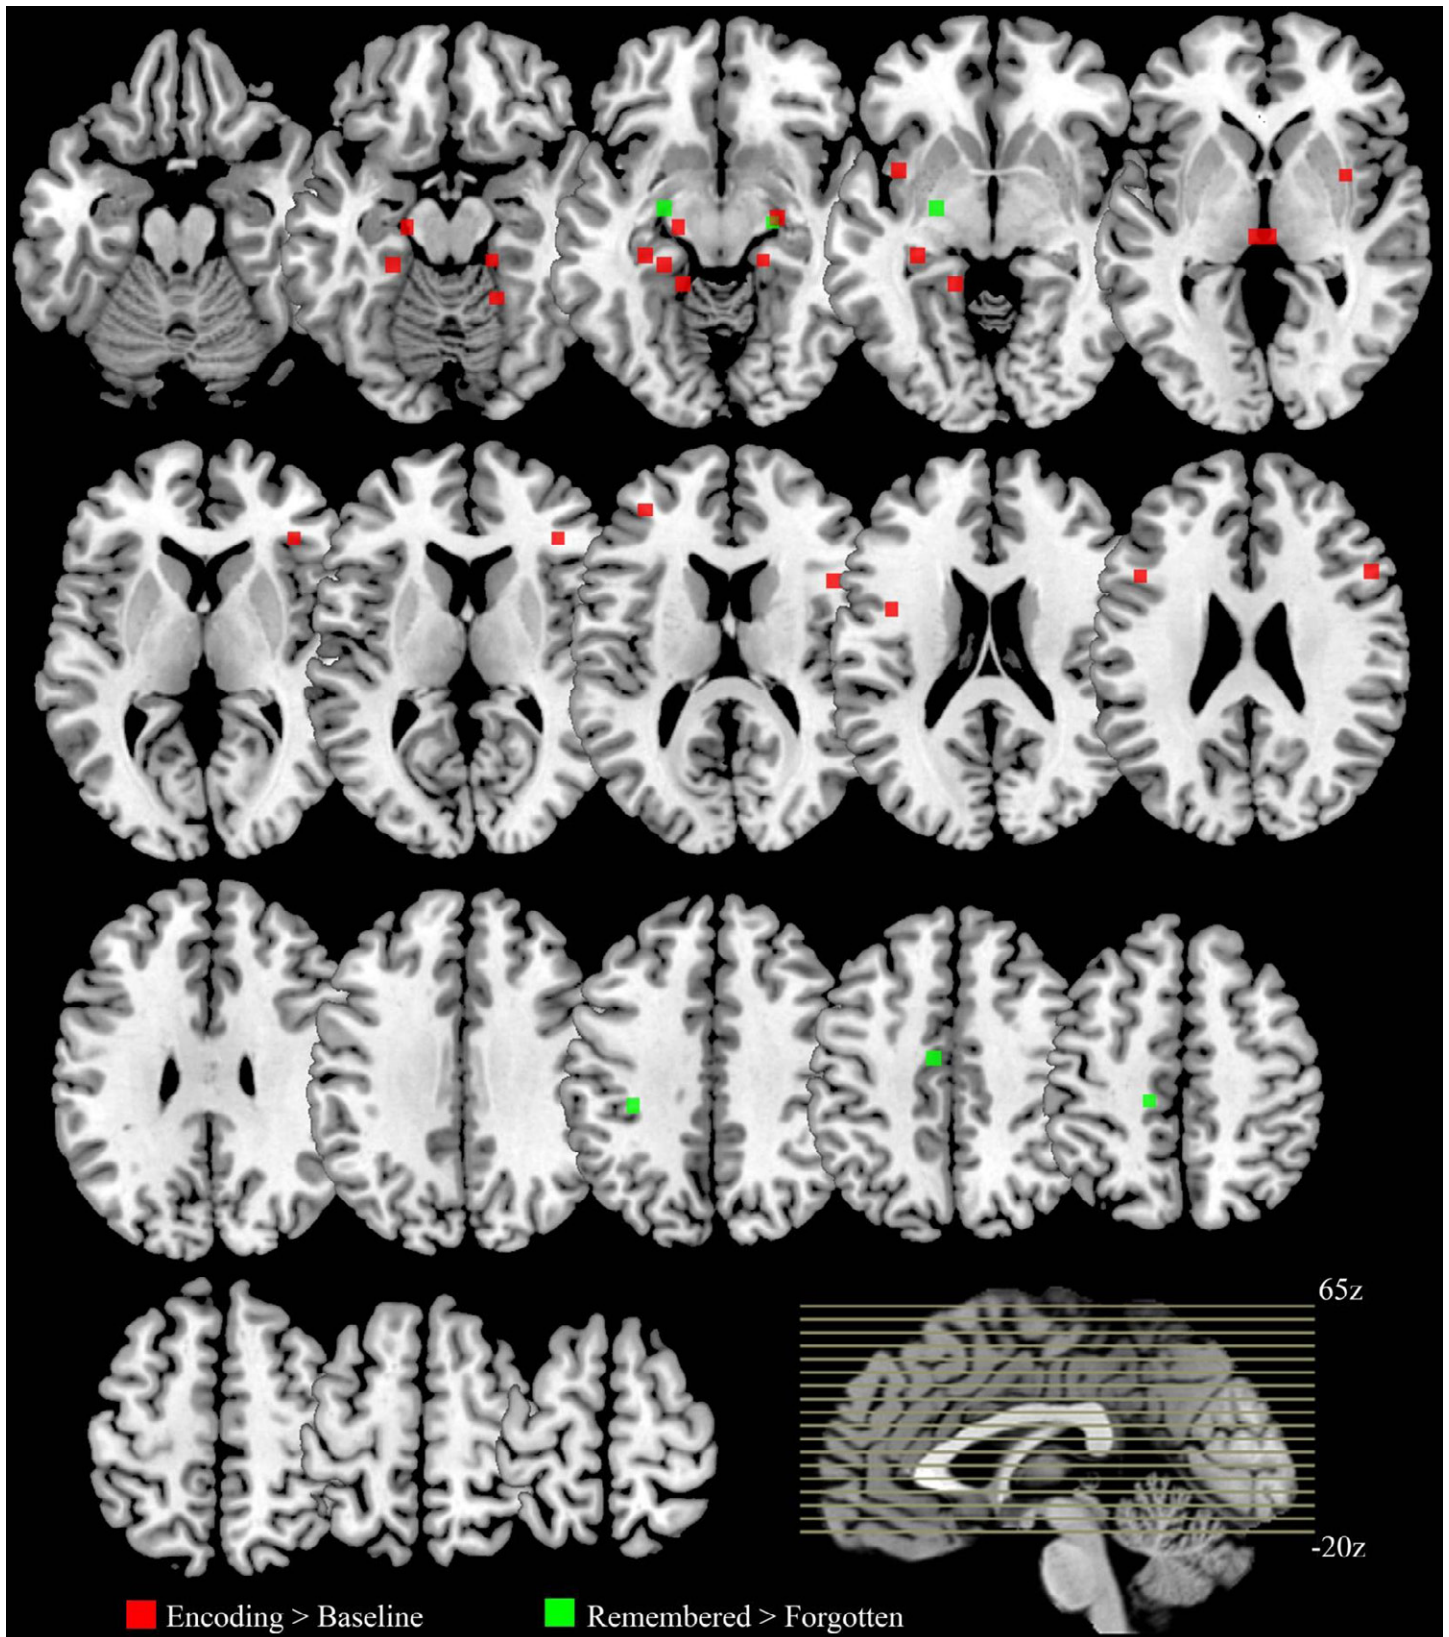

Figure 4 (Supplemental).

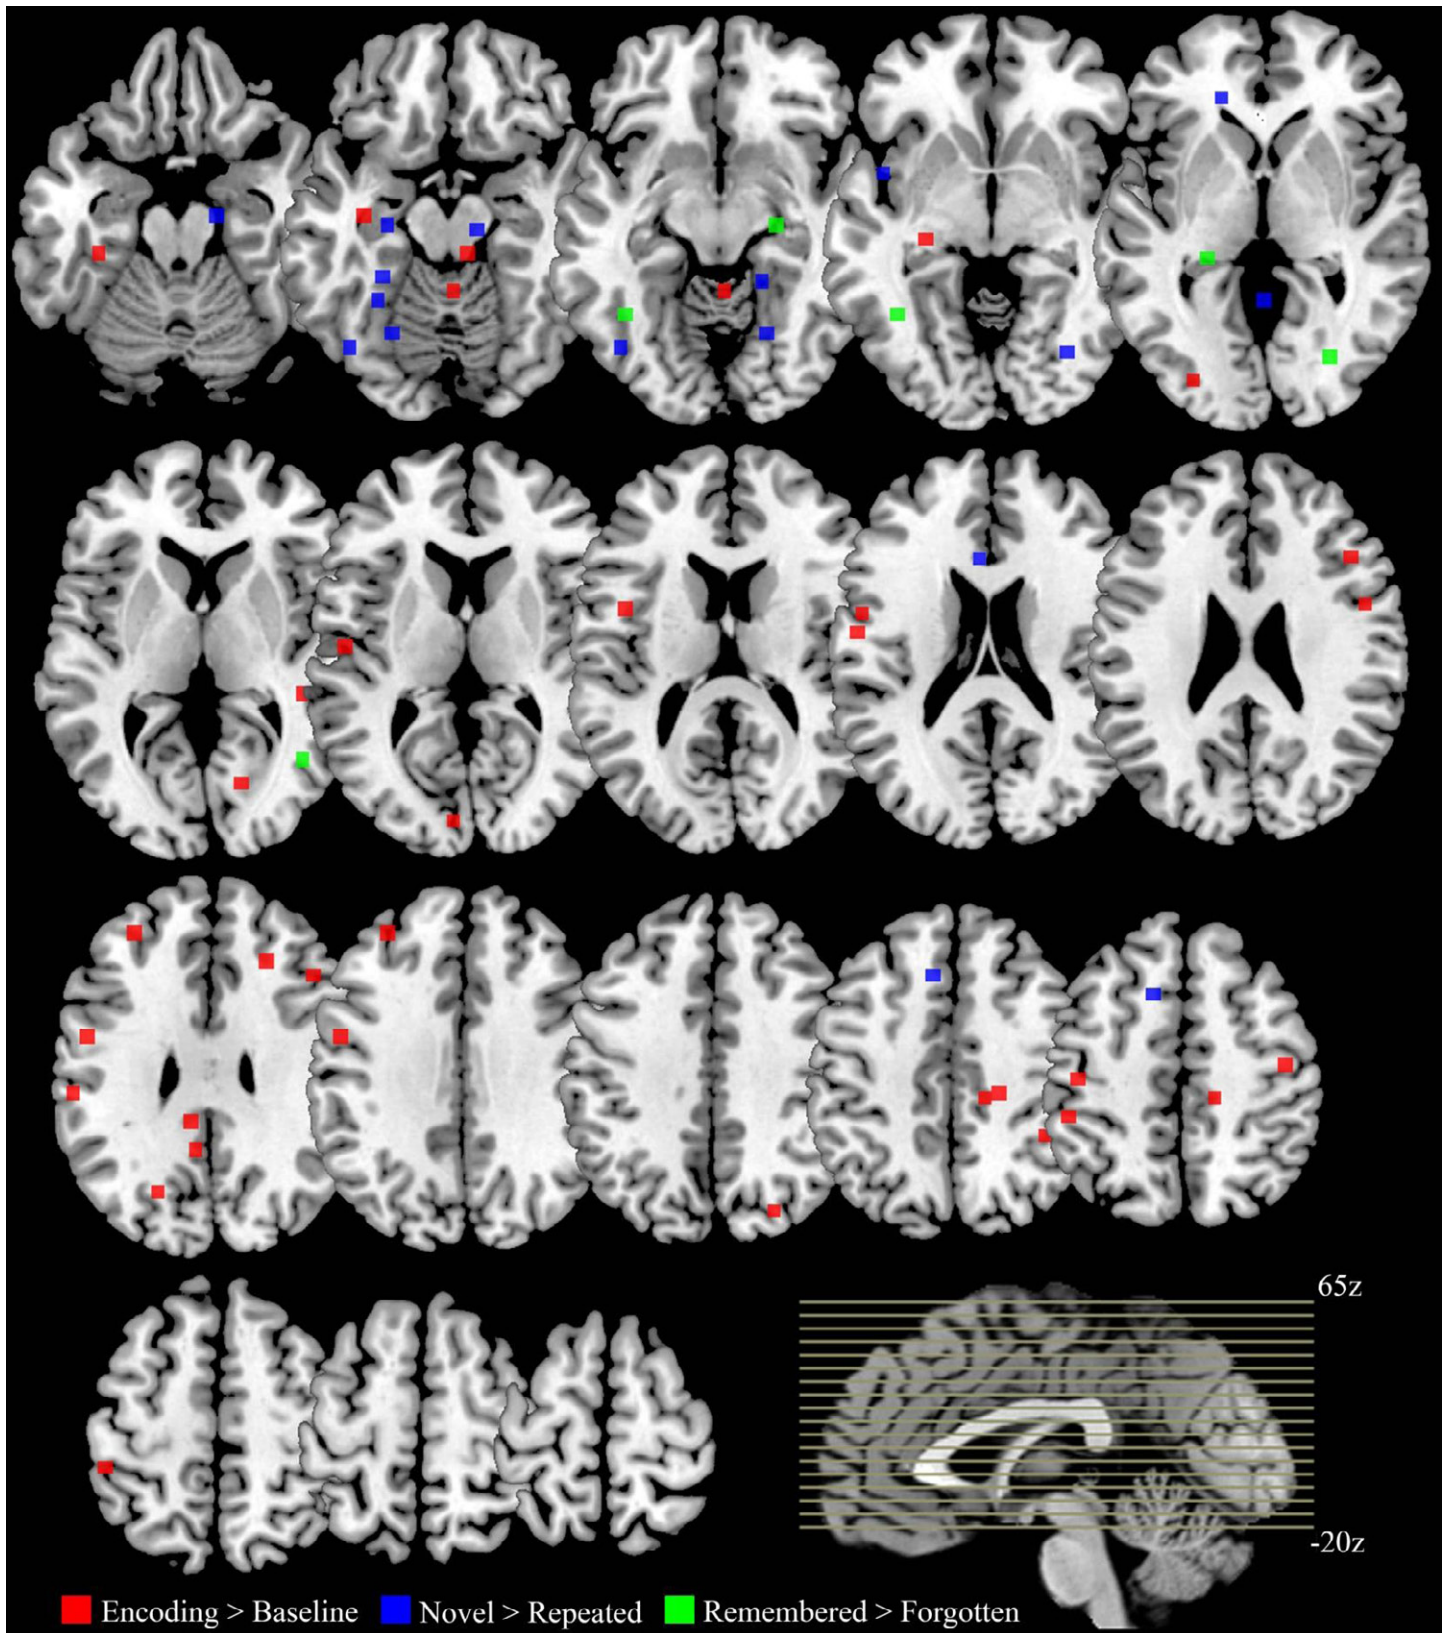

Figure 5 (Supplemental).

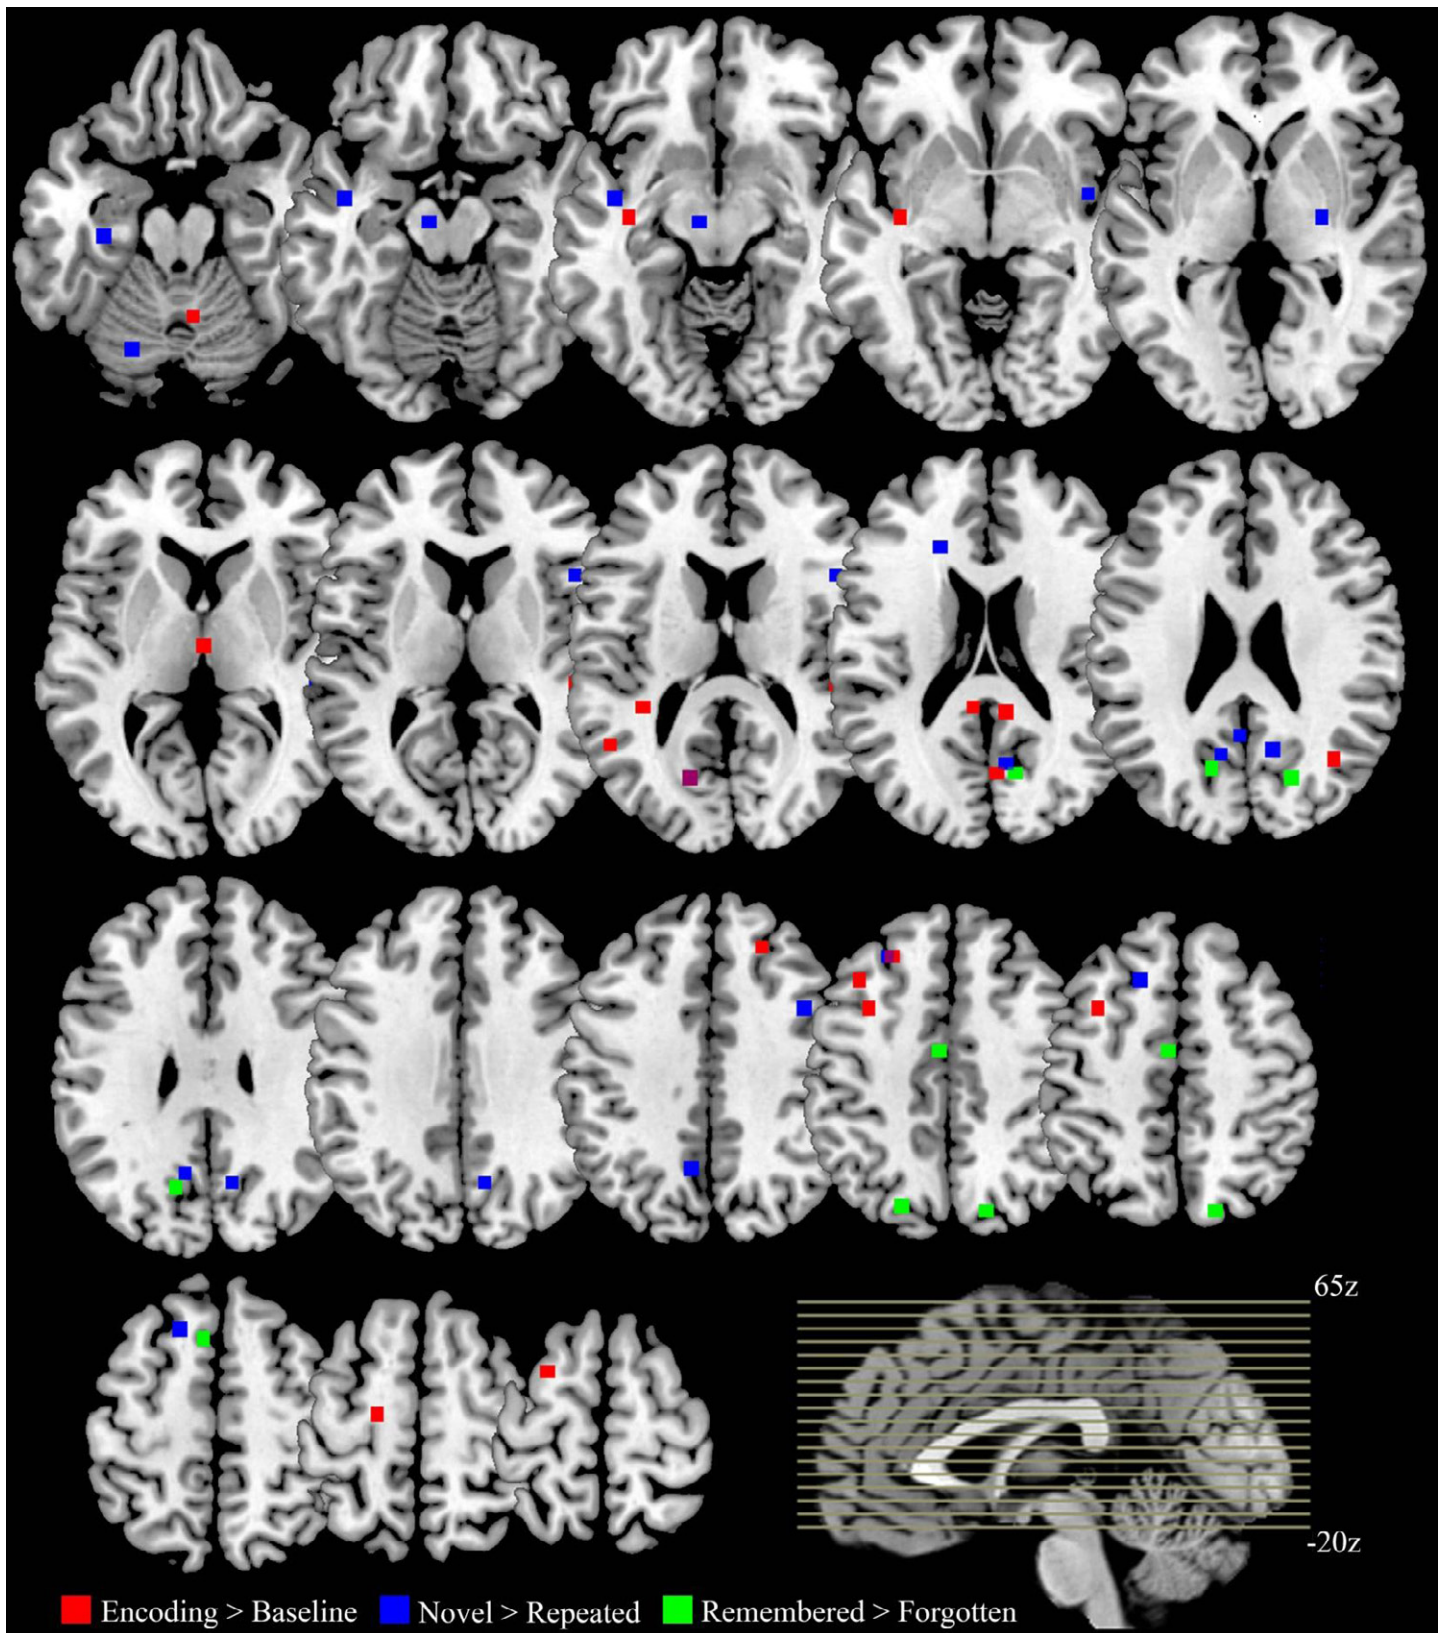

Supplement: NIHMS400639-supplement-01.pdf [file NIHMS400639-supplement-01.pdf]
